# Supplementary material
Source: PubMed Central journal article supplement (PMC4733173)

Supplementary Figure 1: Study flow chart

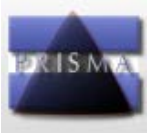

### PRISMA 2009 Flow Diagram

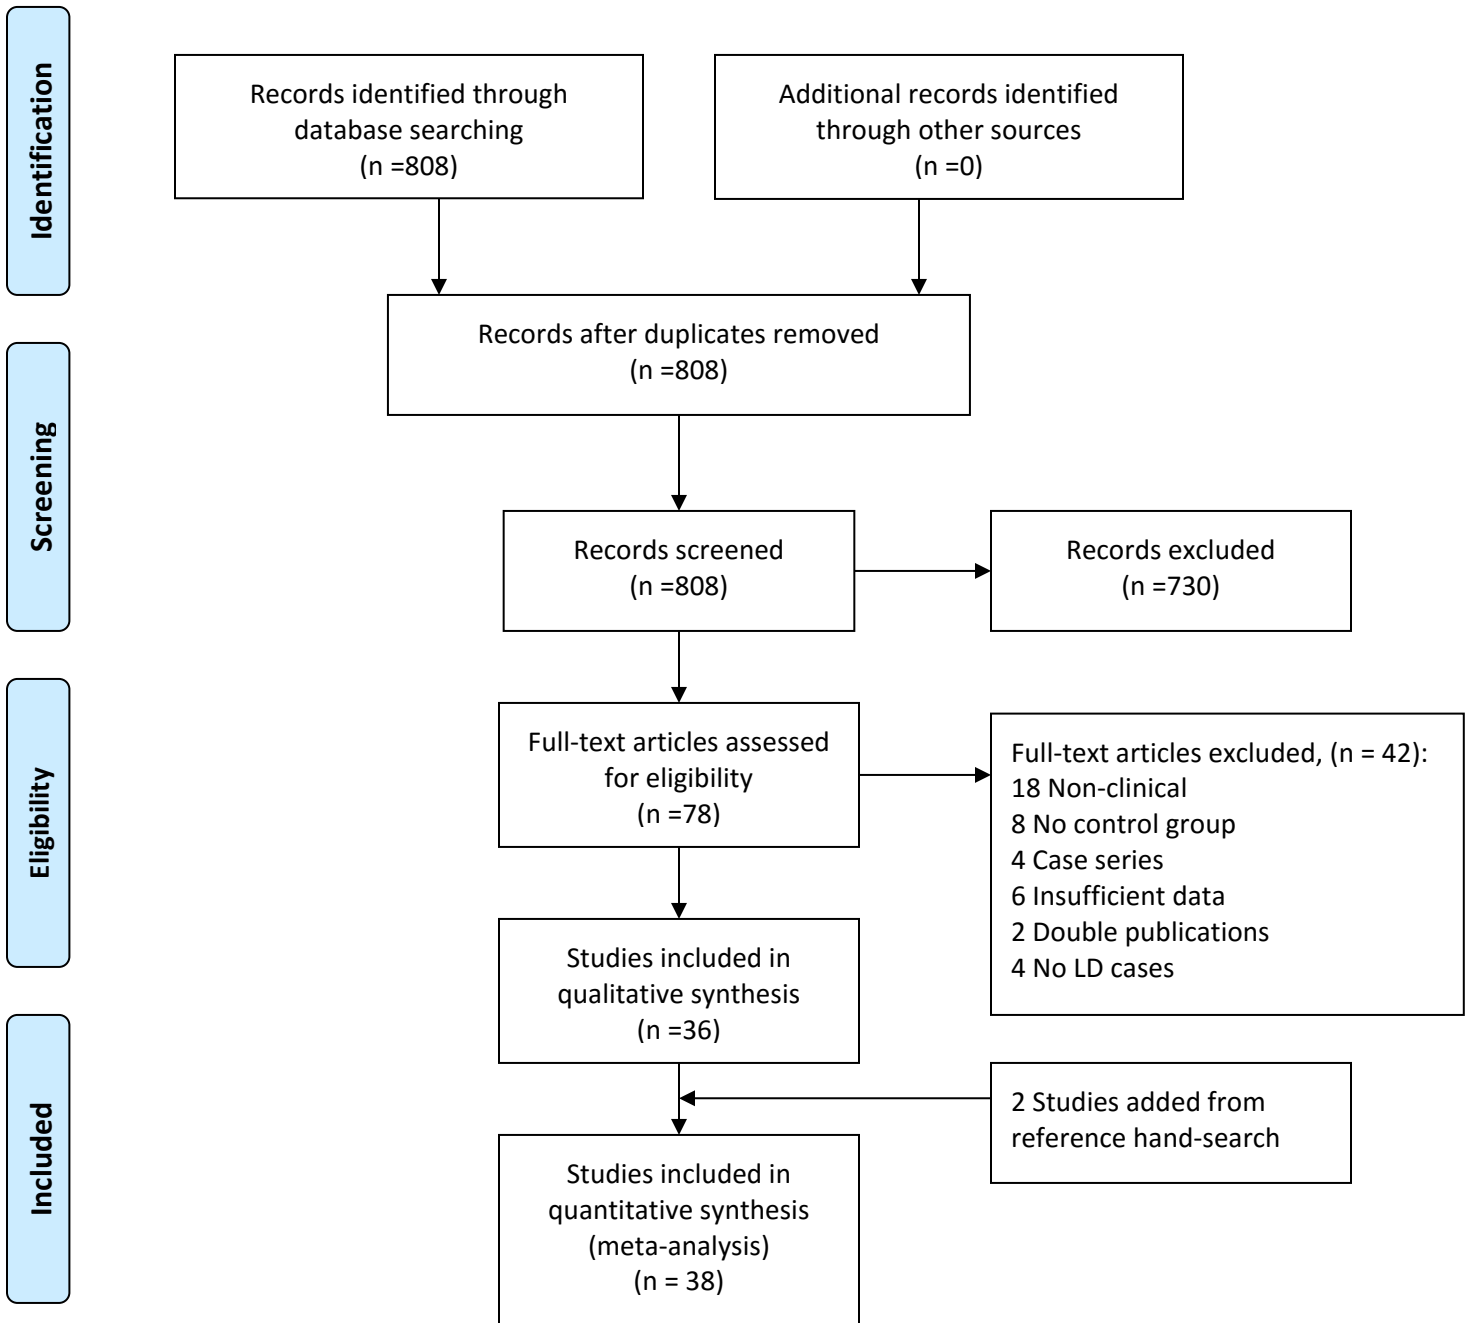

Supplement: JCM.02675-15_zjm002164761so1.pdf [file JCM.02675-15_zjm002164761so1.pdf]
